# Supplementary material
Source: publisher figshare collection journal article supplement (https://acs.figshare.com/ndownloader/files/4535632)
Supplement: Supplementary file 1 [file 4535632]

# Controlled Synthesis of One-Dimensional Sb<sub>2</sub>Se<sub>3</sub> Nanostructures and Their Electrochemical Properties

*Jianmin Ma,<sup>1</sup>Yaping Wang,<sup>2</sup>Yijing Wang,<sup>2</sup>Qing Chen,<sup>1</sup>Jiabiao Lian,<sup>1</sup> and Wenjun Zheng<sup>\*,1</sup>*

<sup>1</sup>Department of Materials Chemistry, College of Chemistry, Nankai University, Tianjin, 300071, P. R. China

<sup>2</sup>Institute of New Energy Material Chemistry, Engineering Research Center of Energy Storage & Conversion (Ministry of Education), Key Laboratory of Energy-Material Chemistry (Tianjin), Nankai University, Tianjin, 300071, P. R. China

Corresponding Author: Prof. Wenjun Zheng

Address: Department of Materials Chemistry, College of Chemistry, Nankai University, Tianjin, P. R. China

Phone: +86-22-23507951

Fax: +86-22-23502458

E-mail: [zhwj@nankai.edu.cn](mailto:zhwj@nankai.edu.cn)

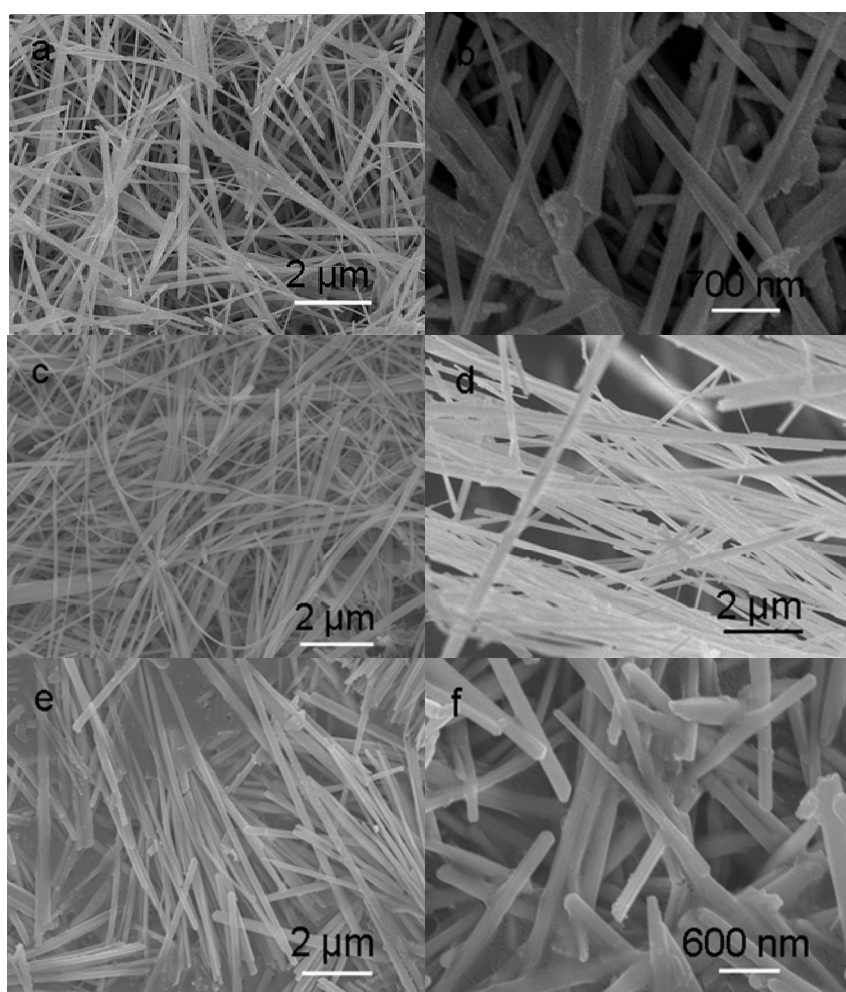

**Figure S1.** Typical SEM images of as-prepared  $\text{Sb}_2\text{Se}_3$ : (a) S4; (b) S5; (c) S6; (d) S7; (e) S8 and (f) S9.
